# Supplementary material
Source: publisher figshare collection journal article supplement (https://tandf.figshare.com/ndownloader/files/18812699)
Supplement: Supplementary file 1 [file 18812699]

**Appendices**

**Appendix 1: Definitions of variables**

|  |  |
| --- | --- |
| **Variables** | **Definitions and sources of variables** |
|  |  |
| Global Terrorism Index (GTI) | Logarithm (1+base) Global Terrorism Index overall score |
|  |  |
| Security Officers & Police | Number of internal security officers and police  per 100,000 people UNODC; EIU estimates |
|  |  |
| Political instability | Political instability  Qualitative assessment by EIU analysts |
| £ |  |
| Weapon imports | Volume of transfers of major conventional weapons  as recipient (imports) per 100,000 people  Stockholm International Peace Research Institute (SIPRI) Arms Transfers Database |
|  |  |
| Weapon exports | Volume of transfers of major conventional weapons as supplier (exports) per 100,000 people  SIPRI Arms Transfers Database |
|  |  |
| Displaced people | Number of refugees and internally displaced people  as a percentage of the population  Office of the High Commissioner for Refugees (UNHCR) Mid-Year Trends; Internal Displacement Monitoring Centre (IDMC) |
|  |  |
| Military expenditure | Military expenditure as a percentage of GDP  The Military Balance, IISS |
|  |  |
| United Nations Peacekeeping Funding. | Financial contribution to UN peacekeeping missions  United Nations Committee on Contributions; IEP |
|  |  |
|  |  |

UNODC: United Nations Office on Drugs and Crime. EIU: Economic Intelligence Unit. UNHCR: United Nations High Commissioner for Refugees. GDP: Gross Domestic Product. IISS: The International Institute for Strategic Studies. UN: United Nations. IEP: Institute for Economics and Peace.

**Appendix 2: Summary Statistics and Presentation of countries**

|  |  |  |  |  |  |
| --- | --- | --- | --- | --- | --- |
| **Panel A: Summary Statistics** | | | | | |
| **Variables** | **Mean** | **Standard dev.** | **Minimum** | **Maximum** | **Obsers** |
|  |  |  |  |  |  |
| Global Terrorism Index (GTI)(Ln) | 0.835 | 0.763 | 0.000 | 2.397 | 977 |
|  |  |  |  |  |  |
| Security Officers & Police | 2.728 | 0.911 | 1.081 | 5.000 | 978 |
|  |  |  |  |  |  |
|  |  |  |  |  |  |
| Political instability | 2.545 | 1.030 | 1.000 | 5.000 | 978 |
|  |  |  |  |  |  |
| Weapon imports | 1.489 | 0.868 | 1.000 | 5.000 | 978 |
|  |  |  |  |  |  |
| Weapon exports | 1.342 | 0.932 | 1.000 | 5.000 | 978 |
|  |  |  |  |  |  |
| Displaced people | 1.348 | 0.872 | 1.000 | 5.000 | 978 |
|  |  |  |  |  |  |
| Military expenditure | 1.966 | 0.824 | 1.000 | 5.000 | 978 |
|  |  |  |  |  |  |
| United Nations Peacekeeping Funding. | 2.291 | 1.164 | 1.000 | 5.000 | 978 |
|  |  |  |  |  |  |
|  |  |  |  |  |  |
| **Panel B: Presentation of countries** | | | | | |
| Afghanistan; Albania; Algeria; Angola; Argentina; Armenia; Australia; Austria; Azerbaijan; Bahrain; Bangladesh; Belarus; Belgium; Benin; Bhutan; Bolivia; Bosnia and Herzegovina; Botswana; Brazil; Bulgaria; Burkina Faso; Burundi; Cambodia; Cameroon; Canada; Central African Republic; Chad; Chile; China; Colombia; Costa Rica; Cote d' Ivoire; Croatia; Cuba; Cyprus; Czech Republic; Democratic Republic of the Congo; Denmark; Djibouti; Dominican Republic; Ecuador; Egypt; El Salvador; Equatorial Guinea; Eritrea; Estonia; Ethiopia; Finland; France; Gabon; Georgia; Germany; Ghana; Greece; Guatemala; Guinea; Guinea-Bissau; Guyana; Haiti; Honduras; Hungary; Iceland; India; Indonesia; Iran; Iraq; Ireland; Israel; Italy; Jamaica; Japan; Jordan; Kazakhstan; Kenya; Kosovo; Kuwait; Kyrgyz Republic; Laos; Latvia; Lebanon; Lesotho; Liberia; Libya; Lithuania; Macedonia (FYR); Madagascar; Malawi; Malaysia; Mali; Mauritania; Mauritius; Mexico; Moldova; Mongolia; Montenegro; Morocco; Mozambique; Myanmar; Namibia; Nepal; Netherlands; New Zealand; Nicaragua; Niger; Nigeria; North Korea; Norway; Oman; Pakistan; Palestine; Panama; Papua New Guinea; Paraguay; Peru; Philippines; Poland; Portugal; Qatar; Republic of the Congo; Romania; Russia; Rwanda; Saudi Arabia; Senegal; Serbia; Sierra Leone; Singapore; Slovakia; Slovenia; Somalia; South Africa; South Korea; South Sudan; Spain; Sri Lanka; Sudan; Swaziland; Sweden; Switzerland; Syria; Taiwan; Tajikistan; Tanzania; Thailand; The Gambia; Timor-Leste; Togo; Trinidad and Tobago; Tunisia; Turkey; Turkmenistan; Uganda; Ukraine; United Arab Emirates; United Kingdom; United States of America; Uruguay; Uzbekistan; Venezuela; Vietnam; Yemen; Zambia and Zimbabwe. | | | | | |
|  |  |  |  |  |  |
|  |  |  |  |  |  |

Standard dev: Standard deviation. Obsers: Observations.

**Appendix 3: Correlation Matrix (uniform sample size: 977)**

|  |  |  |  |  |  |  |  |  |
| --- | --- | --- | --- | --- | --- | --- | --- | --- |
| S O & P | Pol. Insta. | W. Imports | W. Exports | D. People | Military | UNPKF | GTI |  |
| 1.000 | 0.043 | 0.140 | -0.011 | 0.036 | 0.215 | 0.0001 | -0.063 | S O & P |
|  | 1.000 | -0.238 | -0.285 | 0.336 | 0.336 | 0.403 | 0.306 | Pol. Insta. |
|  |  | 1.000 | 0.125 | -0.058 | 0.237 | -0.181 | -0.042 | W. Imports |
|  |  |  | 1.000 | -0.114 | 0.026 | -0.211 | 0.104 | W. Exports |
|  |  |  |  | 1.000 | 0.292 | 0.120 | 0.340 | D. People |
|  |  |  |  |  | 1.000 | -0.011 | 0.236 | Military |
|  |  |  |  |  |  | 1.000 | 0.027 | UNPKF |
|  |  |  |  |  |  |  | 1.000 | GTI |
|  |  |  |  |  |  |  |  |  |

SO & P: Security Officers & Police. Pol. Insta: Political Instability. W. Imports: Weapons Imports. W. Exports: Weapons Exports. D. People: Displaced People. Military: Military Expenditure. UNPKF: United Nations Peacekeeping Funding. GTI: Global Terrorism Index.
